# Supplementary material
Source: PubMed Central journal article supplement (PMC3982756)
Supplement: supp_pp.113.225920_225920supptbl.pdf [file supp_pp.113.225920_225920supptbl.pdf]

1

2 Supplemental data S1.

3

4 **Table S1**

5

| <b>Gene (accession)</b>            | <b>Primers sequence (5'-3')</b>                     | <b>Amplicon size (bp)</b> |
|------------------------------------|-----------------------------------------------------|---------------------------|
| ABC transporter<br>(AW033521)      | F: TGCATGCGTTTGGATATGTT<br>R: ACCCAAGCTTGCAGTACGTT  | 146                       |
| Auxin-efflux carrier<br>(CK715455) | F: GCACAGATGGCTGGGATTAT<br>R: TCAGCTCTCGGGTGGATACT  | 128                       |
| ARF6<br>(BE436460)                 | F: CACAGCCCCATCTTTCTCAT<br>R: CCATCACGGGAAAATGAACT  | 121                       |
| Arg Dec<br>(AW649598)              | F: TCGTAGATGCCGTCTGTGAC<br>R: GATTGCCCAGAAATCAGGAA  | 113                       |
| CrtR<br>(Y14809)                   | F: TTCCCAGTTGGACCTGTAGC<br>R: GGTCCGAAGAACAAGCCATA  | 113                       |
| EBF2<br>(GQ144956)                 | F: GCAGCTCAGTCGAGCTTCTT<br>R: AATTGCCAGGCTGAATGAAC  | 141                       |
| ERECTA<br>(DB682292)               | F: TGGTTCTGCATTGTTGGAAA<br>R: AACACCTCTCCAGGCACAGT  | 106                       |
| Gib oxidase<br>(AK324766)          | F: TGGATACAACCCTTGGAGGA<br>R: GATCGTGTTTTCTGCGATGA  | 100                       |
| GIG<br>(DB718245)                  | F: CGGTATCCATCCAAGGAAAA<br>R: CATAGTCCAGTGTGCCATCG  | 130                       |
| Lys Demet<br>(AK321177)            | F: CGCTTAATGCTTGGTTTGGT<br>R: TCATCCGAAAGTGATGCAGA  | 127                       |
| PR5<br>(AK322591)                  | F: CATCCAATTCAATGCACAGC<br>R: CCACATGGACCGTGATTACA  | 128                       |
| PSY1<br>(BT012712)                 | F: CTGGAAGGGTGACCGATAAA<br>R: ACCAAAGATGCCCATACAGG  | 136                       |
| Rubisco activase<br>(BT012795)     | F: GGGAAACATGTGTTGCCTCT<br>R: ACATTCTGTCGGGTTATCAGC | 135                       |
| SAM Dec<br>(AK319251)              | F: TGCAAGTTTTGAAGCAGTGG<br>R: GTTCCTTCCCGAGAATGTCA  | 131                       |
| ZnF A20/AN1<br>(AK320956)          | F: AGGTTGGCATCACTGGATTC<br>R: TAACAACAGGGTTGGCCTTC  | 138                       |

6

7
